# Supplementary material for: High expression of COL5A2, a member of COL5 family, indicates the poor survival and facilitates cell migration in gastric cancer
Source: PubMed Central journal article supplement (PMC8039095; doi:10.1042/bsr20204293), 2021-04-09

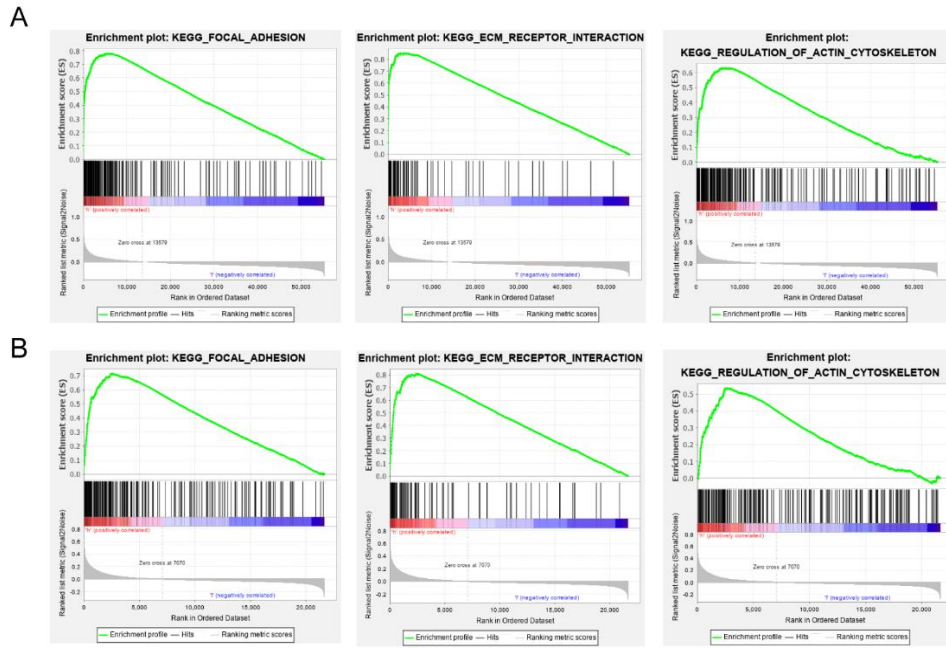

**Supplement figure 1. Gene set enrichment analysis (GSEA) results of invasion and migration. (A) GSEA of COL5A2 using the TCGA database. (B) GSEA of COL5A2 using the GSE62229 dataset.**

SGC-7901 TGF- $\beta$ :

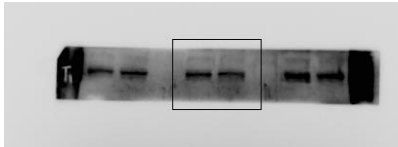

SGC-7901 GAPDH:

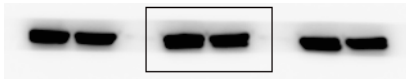

HGC-27 Flag-COL5A2

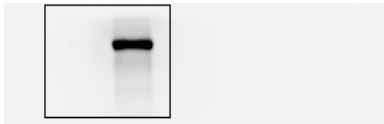

HGC-27 TGF- $\beta$  :

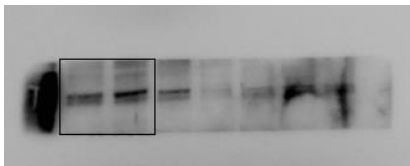

HGC-27 GAPDH:

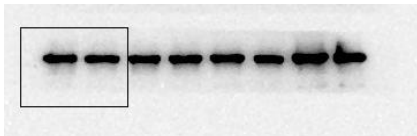

Supplement: BSR-2020-4293_supp.pdf [file BSR-2020-4293_supp.pdf]
